# Supplementary material for: Highly sensitive and simultaneous detection of ctDNAs related to non-small cell lung cancer in serum using a catalytic hairpin assembly strategy in a SERS microfluidic chip
Source: Royal Society of Chemistry journal article supplement (doi:10.1039/d2tb01024k), 2022-01-01
Supplement: d2tb01024k1.pdf [file d2tb01024k1.pdf]

## Electronic Supplementary Information

# Highly sensitive and simultaneous detection of ctDNAs in non-small cell lung cancer serum using catalytic hairpin assembly strategy in a SERS microfluidic chip

Xiaowei Cao, <sup>\*ace</sup> Yu Mao,<sup>ace</sup> Yuexing Gu,<sup>ace</sup> Shengjie Ge,<sup>ace</sup> Wenbo Lu,<sup>b</sup> Yingyan Gu,<sup>ace</sup> and Zhiyue Li<sup>d</sup>

<sup>a</sup>Institute of Translational Medicine, Medical College, Yangzhou University, Yangzhou, 225001, P. R. China.

<sup>b</sup>Shanxi Normal University, College of Chemistry and Material Science, Linfen, 041004, P. R. China.

<sup>c</sup>Jiangsu Key Laboratory of Integrated Traditional Chinese and Western Medicine for Prevention and Treatment of Senile Diseases, Yangzhou University, Yangzhou, 225001, P. R. China.

<sup>d</sup>The First Clinical College, Dalian Medical University, Dalian, 116000, P. R. China.

<sup>e</sup>Jiangsu Key Laboratory of Experimental & Translational Noncoding RNA Research, Medical College, Yangzhou University, Yangzhou, 225001, P. R. China.

\*Correspondence: cxw19861121@163.com

## **Result and discussion**

### **Characterization of SERS probes**

Since SERS probes were of great importance to the signal amplification, the characterization of SERS probes (Au-AgNSs@4-MBA@HP<sub>1-1</sub>) synthesis process was performed. SERS probe was composed of three functional structures: Au-AgNSs acting as the enhancement substrate, 4-MBA acting as Raman reporter molecule, HP<sub>1-1</sub> serving as one of the CHA reactants for enhancing the SERS signal. As illustrated in Fig. S1A, a decrease was caused and the plasmon resonance at 797 nm was red-shifted to 802 nm and 814 nm respectively after the assemble of 4-MBA and HP<sub>1-1</sub> while the pure Au-AgNSs have two strong LSPR bands at about 501 nm and 797 nm. This decrease and red-shift may be caused by the slight aggregation of Au-AgNSs. To further investigate the optical properties and the stability of the prepared SERS probes, we performed an aggregation test: highly concentrated salted solution of 1 M NaCl was added to the SERS probes solution as NaCl was known to induce nanoparticle aggregation. Fig. S1B presented the UV-Vis-NIR absorption spectra of SERS probes before and after adding 1 M NaCl and it could be found that no significant changes in the LSPR spectral position and shape presented though a slight decrease appeared. Thus, BSA could efficiently chemisorbed on the Au-AgNSs surface through the strong sulfur-gold bonds, providing effective stabilization against aggregation.

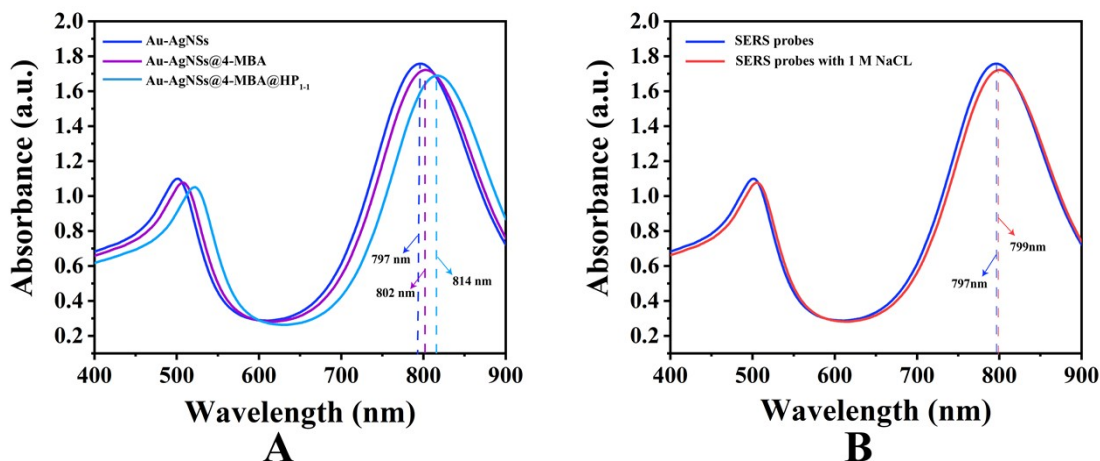

**Fig. S1** Characterization of SERS probes. (A) UV-Vis-NIR spectra of Au-AgNSs, Au-AgNSs@4-MBA and Au-AgNSs@4-MBA @HP<sub>1-1</sub>. (B) UV-vis spectral analysis of SERS probes after incubation in 1 M NaCl.

### The Elemental mappings of Au-Ag nanoshuttles

Fig. S2 was the overlap graph of energy-dispersive X-ray (EDX) spectroscopy elemental mapping on the Au-Ag nanoshuttles. From Fig.S2, it could be found that these NSs have a homogeneous Au–Ag alloy shell around the Au NR core.

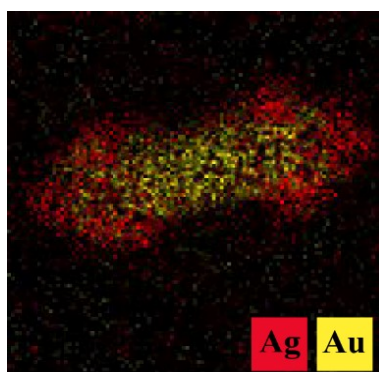

**Fig. S2** Elemental mappings of Au-Ag nanoshuttles.

### The hydrophilic stability of SERS microfluidic chip

The PEG-coated SERS microfluidic chip was stored at room temperature for different days (0, 1, 3, 5 and 10 d). Then the corresponding water contact angles were measured (Fig. S3). The results clearly showed highly stable hydrophilic behavior, as it only exhibited a slight increase in contact angle from 29° to 32° after 10-day storage.

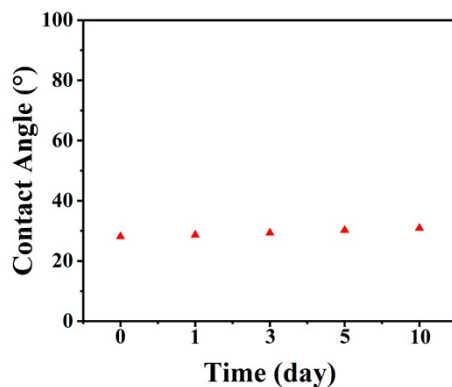

**Fig. S3** Water contact angle measurements of PEG-coated SERS microfluidic chip after storing at room temperature for different days (0, 1, 3, 5 and 10 d).

### Real sample application of SERS microfluidic chip

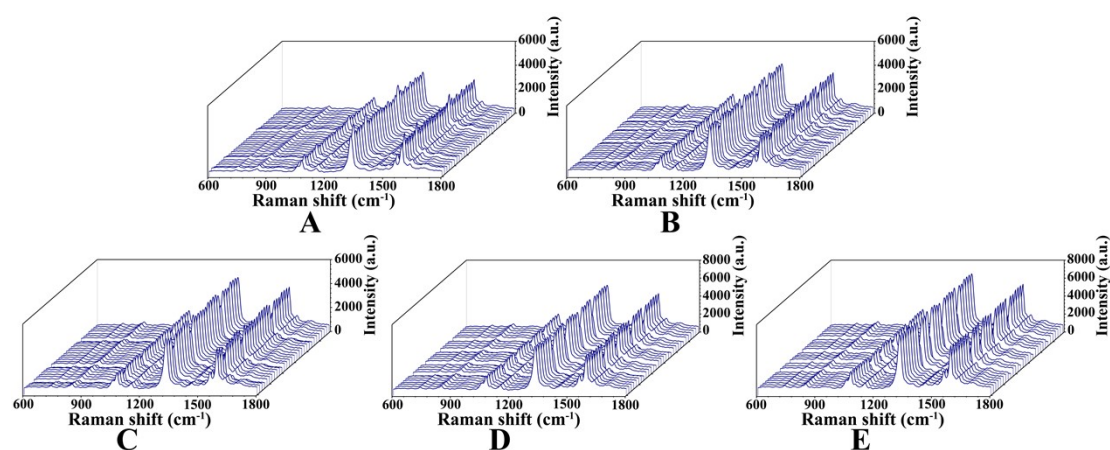

**Fig. S4** Real sample application. SERS spectra of TP53 and PIK3CA-Q546K in serum obtained from healthy subjects (A) and (B) NSCLC patients at stages I, (C) II, (D) III and (E) IV.

**Table S1** Comparison of the proposed microfluidic chip with other methods

| Methods            | Linear range | LOD     | Ref.      |
|--------------------|--------------|---------|-----------|
| SERS               | 1 fM-100 pM  | 9.1 fM  | 1         |
| WCHA-HCR           | 1 fM-1 nM    | 3.0 fM  | 2         |
| Colorimetric probe | 10 fM-1 nM   | 20 pM   | 3         |
| electrochemical    | 10 aM-100 nM | 48 aM   | 4         |
| TSDR               | 1 pM-100 nM  | 0.85 nM | 5         |
| SERS-CHA           | 10 aM-100 pM | 2.34 aM | This work |
|                    |              | 2.26 aM |           |

**Table S2** Results of the pump-free SERS microfluidic chip and qRT-PCR for real samples (Healthy)

| Sample Number | SERS (fM) |              | qRT-PCR (fM) |              | Relative error (%) |              |
|---------------|-----------|--------------|--------------|--------------|--------------------|--------------|
|               | TP53      | PIK3CA-Q546K | TP53         | PIK3CA-Q546K | TP53               | PIK3CA-Q546K |
| 1             | 0.0202    | 0.0132       | 0.0192       | 0.0129       | 4.787              | 5.035        |
| 2             | 0.0146    | 0.0154       | 0.0141       | 0.0147       | 4.269              | 4.478        |
| 3             | 0.0200    | 0.0155       | 0.0215       | 0.0171       | -3.685             | -7.164       |
| 4             | 0.0214    | 0.0149       | 0.0146       | 0.0184       | 5.628              | -3.711       |
| 5             | 0.0217    | 0.0187       | 0.0142       | 0.0168       | 3.968              | 6.832        |
| 6             | 0.0577    | 0.0463       | 0.0501       | 0.0454       | 6.561              | 6.449        |
| 7             | 0.0181    | 0.0197       | 0.0198       | 0.0167       | -5.131             | 6.634        |
| 8             | 0.0205    | 0.0168       | 0.0185       | 0.0133       | 3.945              | 3.809        |
| 9             | 0.0161    | 0.0123       | 0.0212       | 0.0135       | -4.235             | -4.756       |
| 10            | 0.0210    | 0.0180       | 0.0201       | 0.0176       | 4.181              | 6.692        |
| 11            | 0.0208    | 0.0141       | 0.0176       | 0.0133       | 3.281              | 6.782        |
| 12            | 0.0186    | 0.0198       | 0.0206       | 0.0194       | -6.472             | 4.312        |
| 13            | 0.0219    | 0.0175       | 0.0187       | 0.0174       | 3.769              | 5.555        |
| 14            | 0.0197    | 0.0136       | 0.0171       | 0.0129       | 5.933              | 6.567        |
| 15            | 0.0208    | 0.0164       | 0.0210       | 0.0152       | -5.821             | 4.712        |
| 16            | 0.0188    | 0.0161       | 0.0178       | 0.0166       | 6.079              | -4.916       |
| 17            | 0.0202    | 0.0166       | 0.0180       | 0.0159       | 4.145              | 5.639        |
| 18            | 0.0198    | 0.0157       | 0.0180       | 0.0143       | 4.552              | 5.925        |
| 19            | 0.0719    | 0.0668       | 0.0741       | 0.0662       | -3.414             | 5.991        |
| 20            | 0.0191    | 0.0144       | 0.0175       | 0.0132       | 6.399              | 5.177        |
| 21            | 0.0186    | 0.0184       | 0.0182       | 0.0177       | 4.182              | 4.867        |
| 22            | 0.0167    | 0.0169       | 0.0159       | 0.0166       | 5.022              | 4.061        |
| 23            | 0.0219    | 0.0148       | 0.0172       | 0.0147       | 5.007              | 5.885        |
| 24            | 0.0593    | 0.0465       | 0.0576       | 0.0484       | 5.119              | -4.545       |
| 25            | 0.0208    | 0.0201       | 0.0161       | 0.0129       | 4.319              | 5.593        |
| 26            | 0.0184    | 0.0141       | 0.0145       | 0.0124       | 6.304              | 7.053        |
| 27            | 0.0211    | 0.0157       | 0.0161       | 0.0132       | 5.926              | 4.177        |
| 28            | 0.0173    | 0.0131       | 0.0212       | 0.0189       | -4.133             | 3.928        |
| 29            | 0.0177    | 0.0187       | 0.0164       | 0.0174       | 3.688              | 4.618        |
| 30            | 0.0166    | 0.0135       | 0.0158       | 0.0126       | 4.787              | 6.184        |

**Table S3** Results of the pump-free SERS microfluidic chip and qRT-PCR for real samples (NSCLC I)

| Sample Number | SERS (fM) |              | qRT-PCR (fM) |              | Relative error (%) |              |
|---------------|-----------|--------------|--------------|--------------|--------------------|--------------|
|               | TP53      | PIK3CA-Q546K | TP53         | PIK3CA-Q546K | TP53               | PIK3CA-Q546K |
| 1             | 0.087     | 0.056        | 0.085        | 0.052        | 3.511              | 4.838        |
| 2             | 0.067     | 0.056        | 0.064        | 0.051        | 5.408              | 6.333        |
| 3             | 0.077     | 0.054        | 0.076        | 0.045        | 5.988              | 6.288        |
| 4             | 0.083     | 0.046        | 0.072        | 0.048        | 4.379              | -5.582       |
| 5             | 0.084     | 0.059        | 0.063        | 0.043        | 4.592              | 6.221        |
| 6             | 0.079     | 0.056        | 0.068        | 0.053        | 3.41               | 5.122        |
| 7             | 0.012     | 0.020        | 0.016        | 0.022        | -6.022             | -5.891       |
| 8             | 0.078     | 0.048        | 0.073        | 0.049        | 3.507              | -7.122       |
| 9             | 0.058     | 0.056        | 0.083        | 0.052        | -6.174             | 6.394        |
| 10            | 0.087     | 0.044        | 0.082        | 0.047        | 3.705              | -6.605       |
| 11            | 0.078     | 0.053        | 0.077        | 0.045        | 4.972              | 4.859        |
| 12            | 0.026     | 0.021        | 0.028        | 0.019        | -3.987             | 4.679        |
| 13            | 0.071     | 0.062        | 0.064        | 0.061        | 4.902              | 6.456        |
| 14            | 0.073     | 0.056        | 0.057        | 0.051        | 5.377              | 5.993        |
| 15            | 0.071     | 0.065        | 0.084        | 0.062        | -3.437             | 5.471        |
| 16            | 0.074     | 0.053        | 0.072        | 0.062        | 3.888              | -7.062       |
| 17            | 0.084     | 0.058        | 0.082        | 0.051        | 5.381              | 4.791        |
| 18            | 0.025     | 0.026        | 0.022        | 0.029        | 5.739              | -4.833       |
| 19            | 0.083     | 0.052        | 0.081        | 0.045        | 4.497              | 6.636        |
| 20            | 0.073     | 0.065        | 0.068        | 0.061        | 3.793              | 6.028        |
| 21            | 0.082     | 0.061        | 0.079        | 0.054        | 4.246              | 6.145        |
| 22            | 0.076     | 0.045        | 0.079        | 0.043        | -6.475             | 5.681        |
| 23            | 0.025     | 0.027        | 0.028        | 0.022        | -5.043             | 6.799        |
| 24            | 0.068     | 0.053        | 0.067        | 0.055        | 3.559              | -5.003       |
| 25            | 0.064     | 0.046        | 0.061        | 0.043        | 5.549              | 5.322        |
| 26            | 0.077     | 0.049        | 0.078        | 0.048        | -3.672             | 5.113        |
| 27            | 0.083     | 0.062        | 0.082        | 0.058        | 3.879              | 6.896        |
| 28            | 0.078     | 0.055        | 0.062        | 0.053        | 5.635              | 6.592        |
| 29            | 0.061     | 0.054        | 0.063        | 0.045        | -5.145             | 5.778        |
| 30            | 0.074     | 0.042        | 0.079        | 0.062        | 5.726              | -6.484       |

**Table S4** Results of the pump-free SERS microfluidic chip and qRT-PCR for real samples (NSCLC II)

| Sample Number | SERS (fM) |              | qRT-PCR (fM) |              | Relative error (%) |              |
|---------------|-----------|--------------|--------------|--------------|--------------------|--------------|
|               | TP53      | PIK3CA-Q546K | TP53         | PIK3CA-Q546K | TP53               | PIK3CA-Q546K |
| 1             | 0.176     | 0.086        | 0.166        | 0.082        | 6.391              | 5.939        |
| 2             | 0.174     | 0.099        | 0.161        | 0.097        | 6.399              | 6.208        |
| 3             | 0.172     | 0.108        | 0.152        | 0.107        | 5.428              | 5.108        |
| 4             | 0.115     | 0.108        | 0.102        | 0.104        | 6.248              | 5.174        |
| 5             | 0.101     | 0.092        | 0.108        | 0.108        | -5.956             | -4.905       |
| 6             | 0.122     | 0.101        | 0.155        | 0.100        | -5.609             | 6.845        |
| 7             | 0.129     | 0.112        | 0.125        | 0.094        | 6.166              | 4.813        |
| 8             | 0.183     | 0.097        | 0.148        | 0.098        | 3.362              | -4.411       |
| 9             | 0.116     | 0.108        | 0.109        | 0.098        | 3.711              | 6.971        |
| 10            | 0.185     | 0.086        | 0.187        | 0.111        | -3.378             | -3.987       |
| 11            | 0.057     | 0.106        | 0.065        | 0.099        | -5.777             | 5.786        |
| 12            | 0.187     | 0.103        | 0.165        | 0.106        | 5.761              | -4.947       |
| 13            | 0.174     | 0.107        | 0.104        | 0.088        | 5.685              | 4.932        |
| 14            | 0.134     | 0.106        | 0.126        | 0.103        | 4.828              | 6.574        |
| 15            | 0.136     | 0.099        | 0.098        | 0.098        | 3.963              | 4.763        |
| 16            | 0.117     | 0.116        | 0.191        | 0.103        | -4.559             | 3.932        |
| 17            | 0.139     | 0.109        | 0.108        | 0.108        | 6.286              | 3.679        |
| 18            | 0.129     | 0.086        | 0.156        | 0.090        | -6.228             | -4.538       |
| 19            | 0.187     | 0.110        | 0.154        | 0.112        | 4.029              | 6.294        |
| 20            | 0.117     | 0.094        | 0.172        | 0.091        | -4.783             | 6.856        |
| 21            | 0.175     | 0.093        | 0.129        | 0.092        | 4.898              | 4.434        |
| 22            | 0.071     | 0.052        | 0.069        | 0.055        | 3.513              | -4.527       |
| 23            | 0.143     | 0.108        | 0.106        | 0.106        | 3.682              | 4.136        |
| 24            | 0.161     | 0.109        | 0.182        | 0.089        | -6.184             | 5.084        |
| 25            | 0.132     | 0.099        | 0.126        | 0.097        | 6.389              | 3.999        |
| 26            | 0.181     | 0.088        | 0.168        | 0.086        | 3.28               | 5.996        |
| 27            | 0.035     | 0.097        | 0.037        | 0.094        | -5.073             | 3.829        |
| 28            | 0.151     | 0.105        | 0.142        | 0.086        | 5.045              | 5.787        |
| 29            | 0.182     | 0.115        | 0.138        | 0.095        | 6.292              | 4.907        |
| 30            | 0.181     | 0.114        | 0.154        | 0.084        | 6.391              | 4.839        |

**Table S5** Results of the pump-free SERS microfluidic chip and qRT-PCR for real samples (NSCLC III)

| Sample Number | SERS (fM) |              | qRT-PCR (fM) |              | Relative error (%) |              |
|---------------|-----------|--------------|--------------|--------------|--------------------|--------------|
|               | TP53      | PIK3CA-Q546K | TP53         | PIK3CA-Q546K | TP53               | PIK3CA-Q546K |
| 1             | 0.650     | 0.393        | 0.567        | 0.325        | 3.809              | 4.461        |
| 2             | 0.612     | 0.392        | 0.548        | 0.353        | 5.232              | 4.899        |
| 3             | 0.715     | 0.314        | 0.652        | 0.291        | 5.628              | 5.086        |
| 4             | 0.593     | 0.329        | 0.664        | 0.419        | -5.852             | -4.787       |
| 5             | 0.051     | 0.040        | 0.530        | 0.035        | -4.331             | 6.036        |
| 6             | 0.557     | 0.339        | 0.546        | 0.288        | 5.421              | 5.801        |
| 7             | 0.568     | 0.265        | 0.534        | 0.257        | 5.367              | 5.882        |
| 8             | 0.601     | 0.415        | 0.501        | 0.382        | 3.427              | 4.118        |
| 9             | 0.562     | 0.368        | 0.504        | 0.315        | 3.751              | 6.979        |
| 10            | 0.061     | 0.031        | 0.058        | 0.033        | 3.379              | -5.652       |
| 11            | 0.670     | 0.341        | 0.651        | 0.295        | 3.417              | 5.891        |
| 12            | 0.686     | 0.419        | 0.654        | 0.269        | 3.407              | 6.525        |
| 13            | 0.575     | 0.357        | 0.620        | 0.417        | -4.005             | -6.644       |
| 14            | 0.656     | 0.378        | 0.649        | 0.358        | 6.314              | 4.348        |
| 15            | 0.687     | 0.381        | 0.681        | 0.393        | 3.256              | -4.721       |
| 16            | 0.061     | 0.029        | 0.063        | 0.031        | -3.971             | -6.714       |
| 17            | 0.636     | 0.419        | 0.604        | 0.372        | 6.586              | 4.527        |
| 18            | 0.680     | 0.376        | 0.531        | 0.356        | 4.497              | 3.818        |
| 19            | 0.506     | 0.387        | 0.504        | 0.340        | 3.504              | 4.017        |
| 20            | 0.638     | 0.392        | 0.619        | 0.391        | 4.344              | 4.452        |
| 21            | 0.585     | 0.388        | 0.563        | 0.370        | 6.224              | 3.913        |
| 22            | 0.677     | 0.269        | 0.567        | 0.390        | 4.737              | -4.302       |
| 23            | 0.682     | 0.418        | 0.582        | 0.333        | 4.424              | 7.173        |
| 24            | 0.712     | 0.293        | 0.604        | 0.271        | 5.81               | 3.983        |
| 25            | 0.563     | 0.462        | 0.552        | 0.409        | 4.86               | 4.092        |
| 26            | 0.062     | 0.049        | 0.056        | 0.041        | 6.558              | 7.108        |
| 27            | 0.657     | 0.282        | 0.522        | 0.267        | 6.023              | 3.789        |
| 28            | 0.613     | 0.411        | 0.601        | 0.326        | 4.714              | 5.796        |
| 29            | 0.665     | 0.321        | 0.606        | 0.314        | 4.566              | 5.473        |
| 30            | 0.598     | 0.407        | 0.535        | 0.393        | 3.809              | 5.641        |



**Table S6** Results of the pump-free SERS microfluidic chip and qRT-PCR for real samples (NSCLC IV)

| Sample Number | SERS (fM) |              | qRT-PCR (fM) |              | Relative error (%) |              |
|---------------|-----------|--------------|--------------|--------------|--------------------|--------------|
|               | TP53      | PIK3CA-Q546K | TP53         | PIK3CA-Q546K | TP53               | PIK3CA-Q546K |
| 1             | 1.206     | 0.856        | 1.015        | 0.848        | 4.244              | 4.609        |
| 2             | 1.187     | 0.840        | 1.102        | 0.773        | 4.961              | 3.871        |
| 3             | 1.167     | 0.829        | 1.181        | 0.823        | 4.097              | 6.333        |
| 4             | 1.293     | 0.836        | 1.289        | 0.767        | 3.761              | 6.482        |
| 5             | 1.296     | 0.863        | 1.120        | 0.827        | 4.333              | 6.467        |
| 6             | 1.196     | 0.729        | 1.148        | 0.756        | 4.002              | 6.878        |
| 7             | 1.225     | 0.792        | 0.989        | 0.743        | 3.525              | 3.88         |
| 8             | 0.286     | 0.316        | 0.256        | 0.321        | 6.482              | 6.957        |
| 9             | 1.177     | 0.833        | 1.082        | 0.797        | 4.771              | 6.807        |
| 10            | 1.226     | 0.770        | 1.182        | 0.808        | 3.291              | -4.164       |
| 11            | 1.264     | 0.799        | 1.001        | 0.792        | 4.677              | 5.868        |
| 12            | 1.277     | 0.809        | 1.155        | 0.737        | 6.498              | 3.685        |
| 13            | 1.145     | 0.769        | 1.124        | 0.731        | 5.16               | 4.75         |
| 14            | 0.224     | 0.348        | 0.242        | 0.346        | 4.717              | 6.988        |
| 15            | 1.258     | 0.834        | 1.118        | 0.717        | 4.644              | 6.934        |
| 16            | 1.189     | 0.745        | 0.997        | 0.741        | 5.397              | 4.462        |
| 17            | 1.226     | 0.731        | 1.192        | 0.849        | 5.506              | -6.874       |
| 18            | 0.627     | 0.528        | 0.640        | 0.531        | 3.459              | 6.482        |
| 19            | 1.141     | 0.786        | 1.247        | 0.780        | -3.601             | 3.873        |
| 20            | 1.081     | 0.788        | 0.998        | 0.785        | 4.798              | 6.164        |
| 21            | 1.237     | 0.814        | 1.212        | 0.744        | 5.998              | 5.344        |
| 22            | 1.020     | 0.785        | 1.213        | 0.780        | -6.438             | 6.267        |
| 23            | 1.082     | 0.729        | 1.094        | 0.715        | -3.879             | 3.928        |
| 24            | 0.302     | 0.243        | 0.317        | 0.252        | 4.751              | 5.689        |
| 25            | 1.188     | 0.726        | 1.141        | 0.733        | 6.064              | -4.043       |
| 26            | 1.187     | 0.780        | 1.074        | 0.751        | 6.22               | 5.371        |
| 27            | 1.254     | 0.863        | 1.031        | 0.864        | 3.587              | 6.488        |
| 28            | 1.260     | 0.848        | 1.009        | 0.742        | 5.729              | 5.128        |
| 29            | 1.243     | 0.837        | 1.181        | 0.749        | 6.012              | 6.527        |
| 30            | 1.277     | 0.806        | 1.192        | 0.742        | 4.244              | 4.006        |

## Reference

- 1 X. Miao, Q. Fang, X. Xiao, S. Liu, R. Wu, J. Yan, B. Nie and J. Liu, *Front. Biosci.*, 2021, **8**, 676065.
- 2 H. Chang, Y.Y. Zhang, F. Yang, C.T. Wang and H.F. Dong, *Front. Chem.*, 2018, **6**, 530
- 3 C.K. Chen, Y.C. Shiang, C.C. Huang and H.T. Chang, *Biosens. Bioelectron.*, 2011, **26**, 3464-3468.
- 4 H. Chai and P. Miao, *Chin. Chem. Lett.*, 2021, **32**, 783-786.
- 5 S. Luo, Y. Zhang, G. Huang, S. Bo, X. Ye, M. Tao, Y. Huang, B. Li, X. Jiang, Q. Wang and L. Zheng, *Sensor. Actuat. B-Chem.*, 2021, **338**, 129857.
